# Supplementary material
Source: Springer Nature journal article supplement (https://www.springermedizin.de/resource/supplementary/12879_2009_1022_MOESM1_ESM.pdf/9442406)

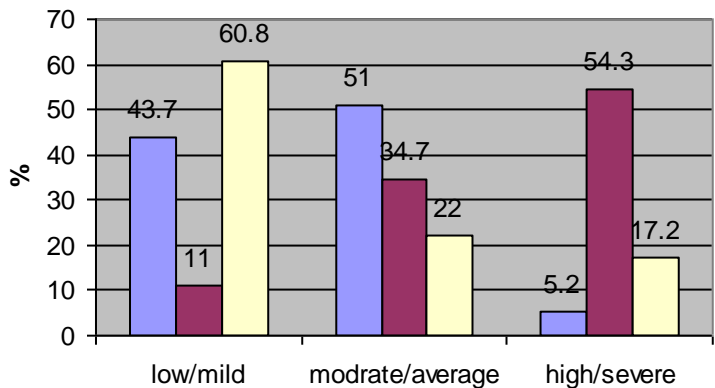

■ Knowledge ■ Concern ■ Precautions

Supplement: MOESM1 [file 9442406]
